# Supplementary material for: Dynamic changes in short- and long-term bacterial composition following fecal microbiota transplantation for recurrent Clostridium difficile infection
Source: PubMed Central journal article supplement (PMC4378022; doi:10.1186/s40168-015-0070-0), 2015-03-30

# Pearson

# Spearman

CD1

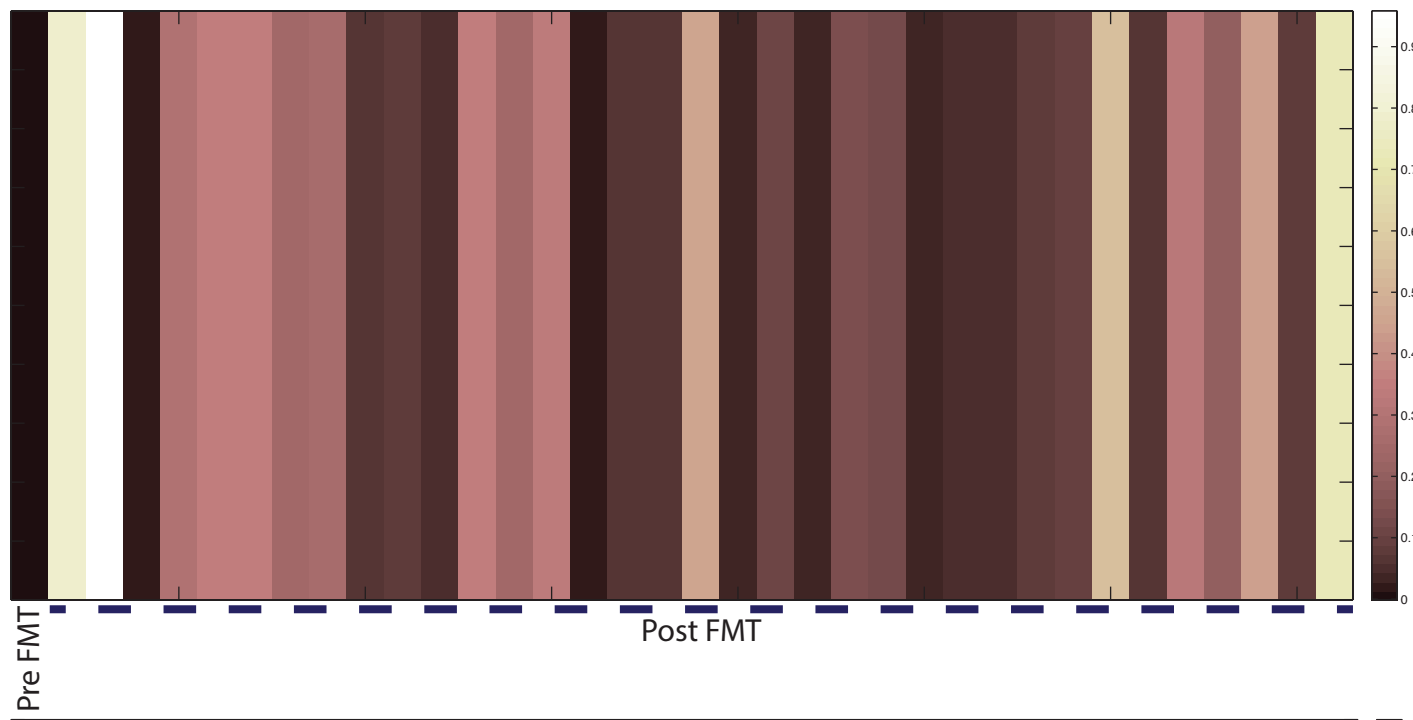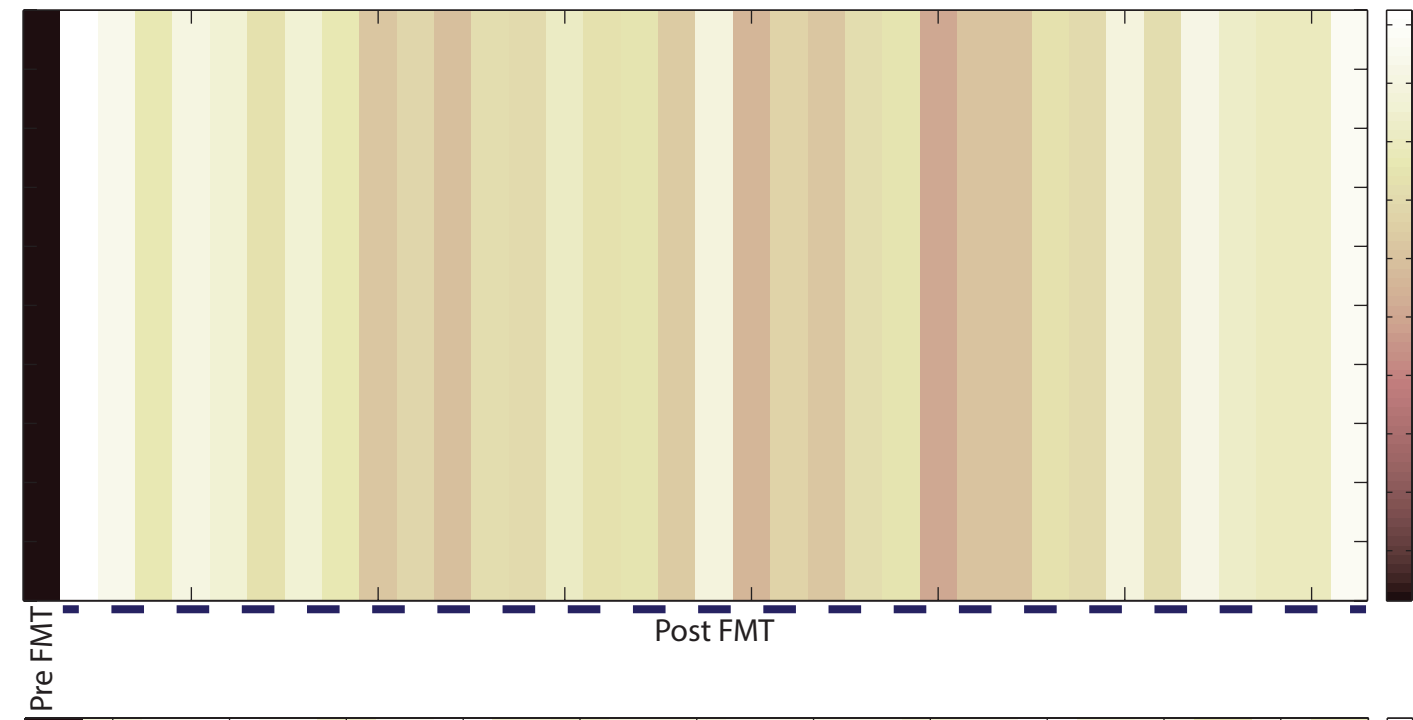

CD2

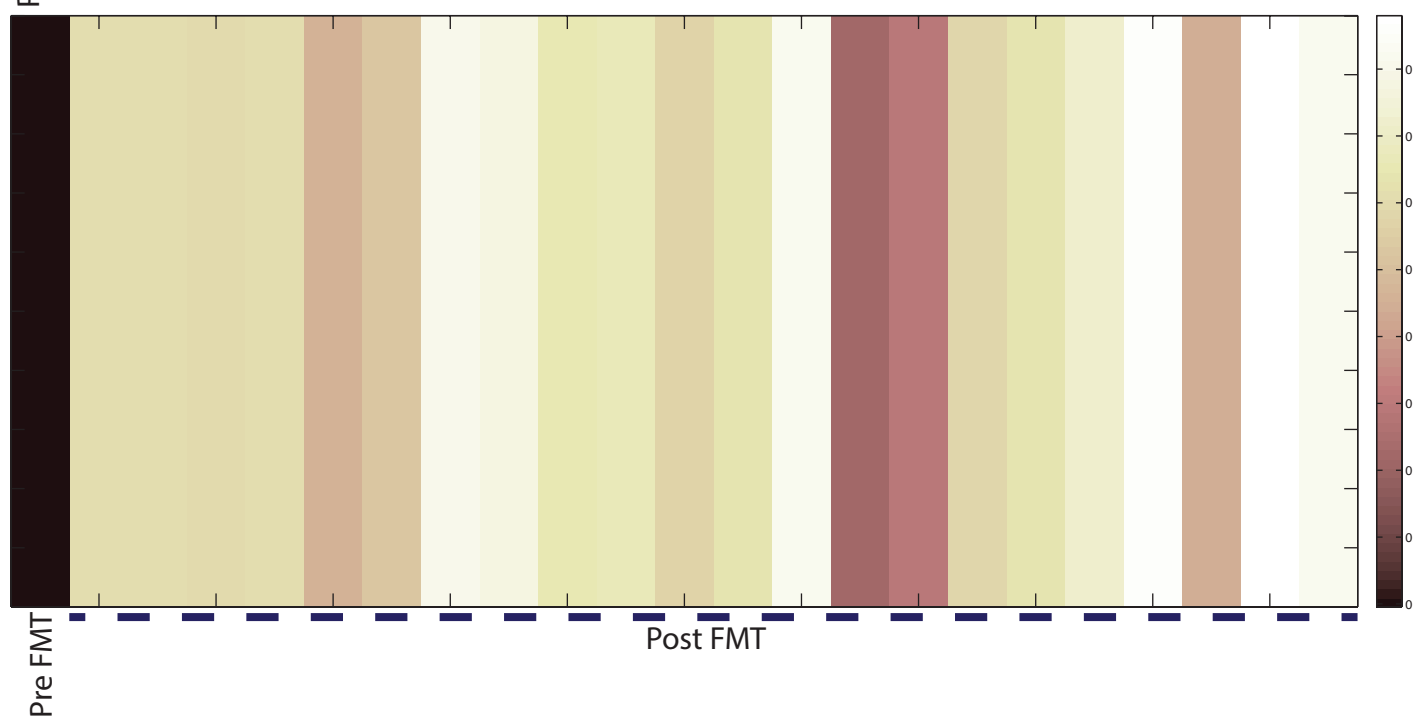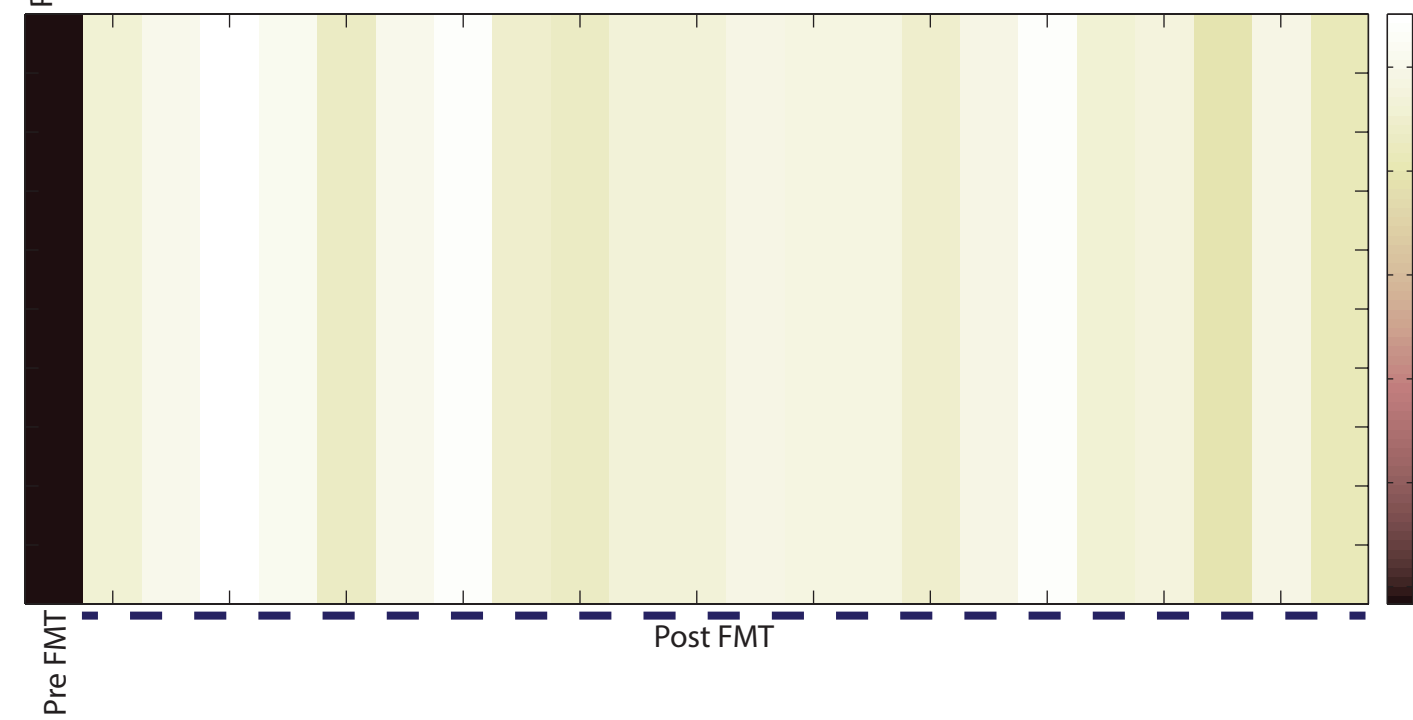

CD3

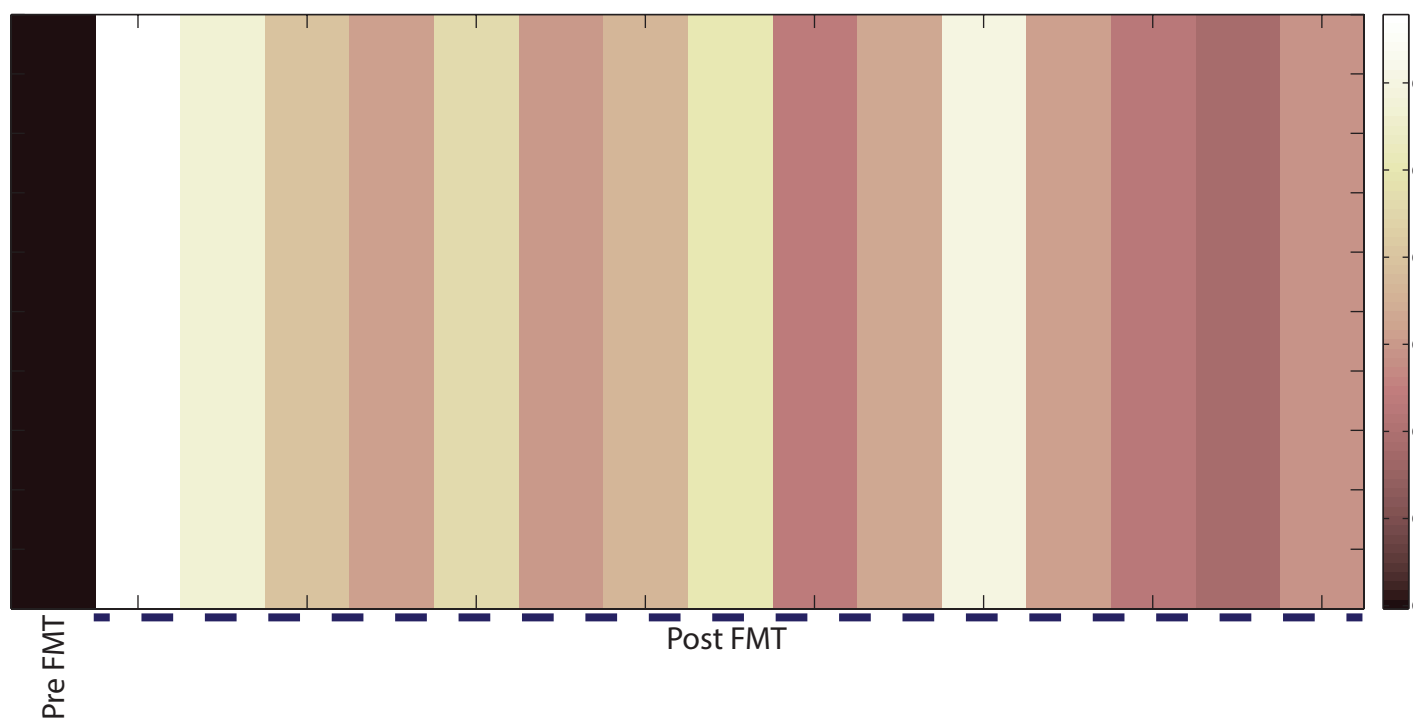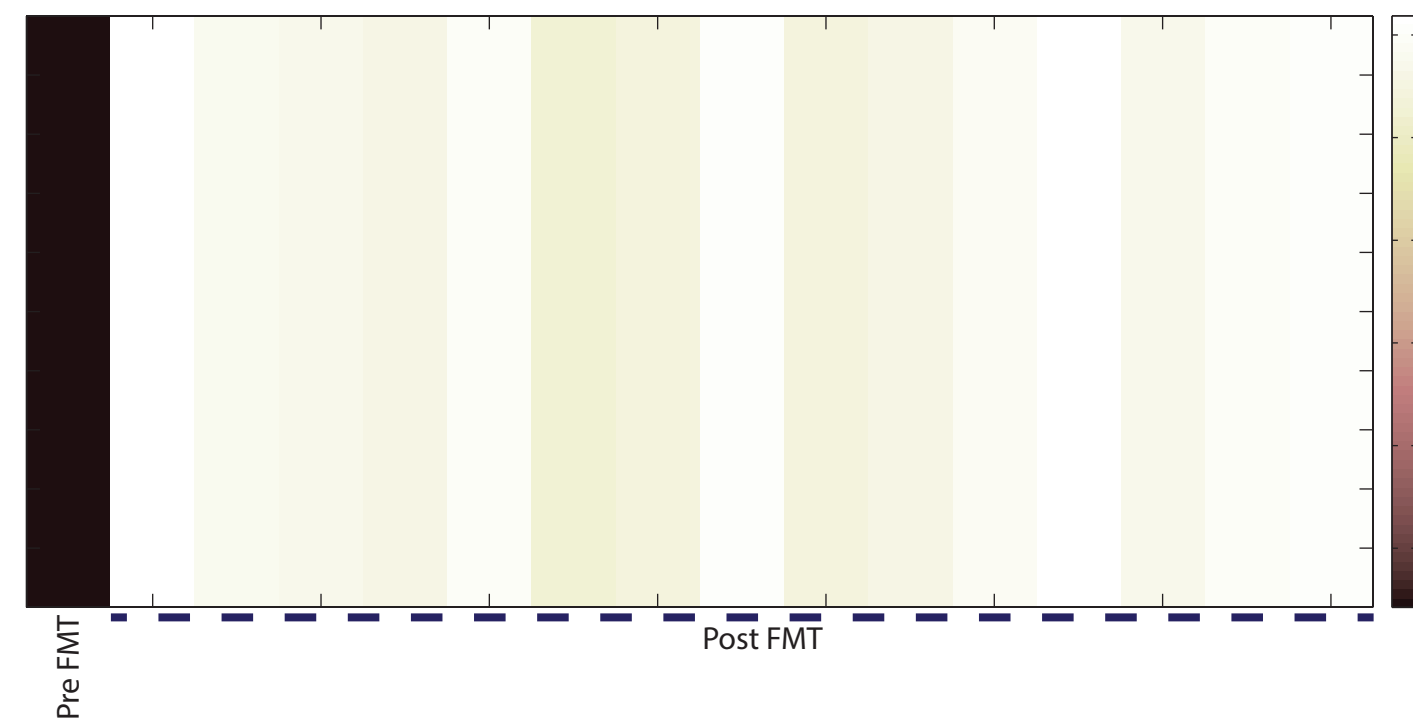

CD4

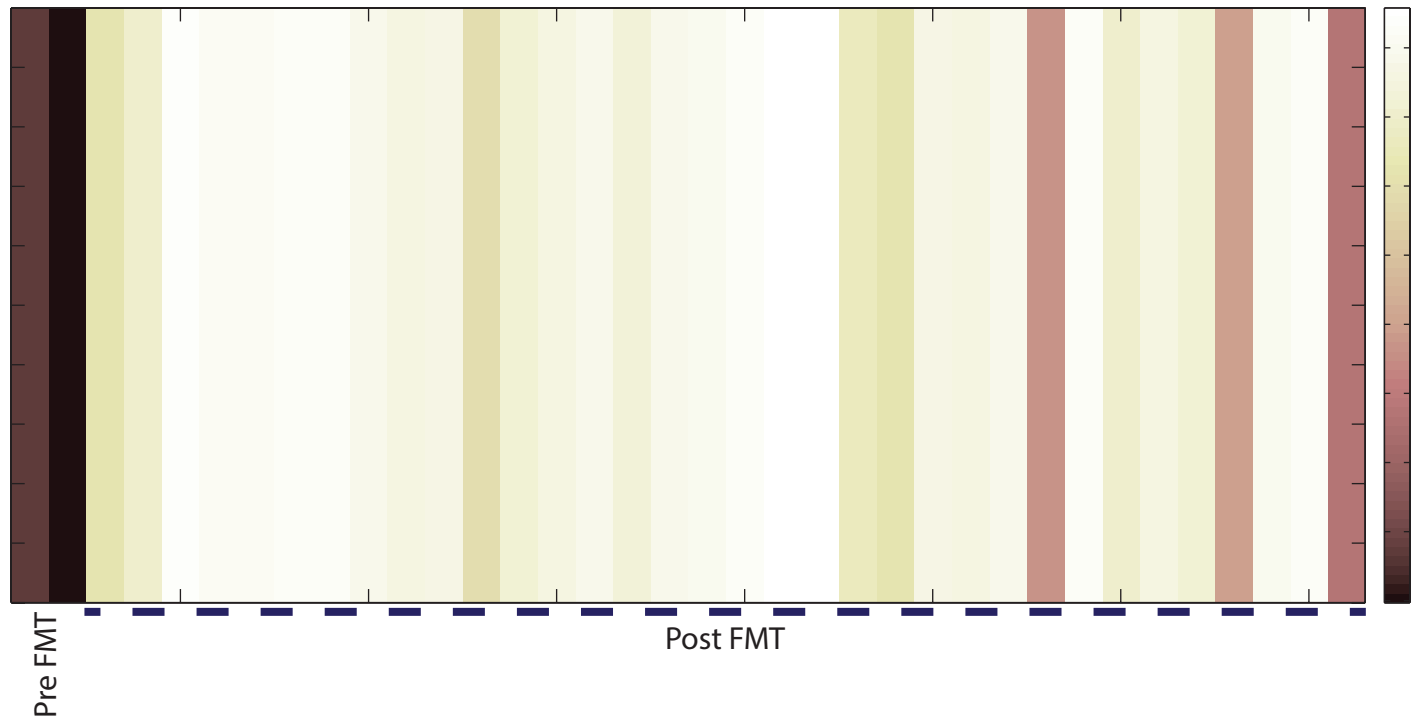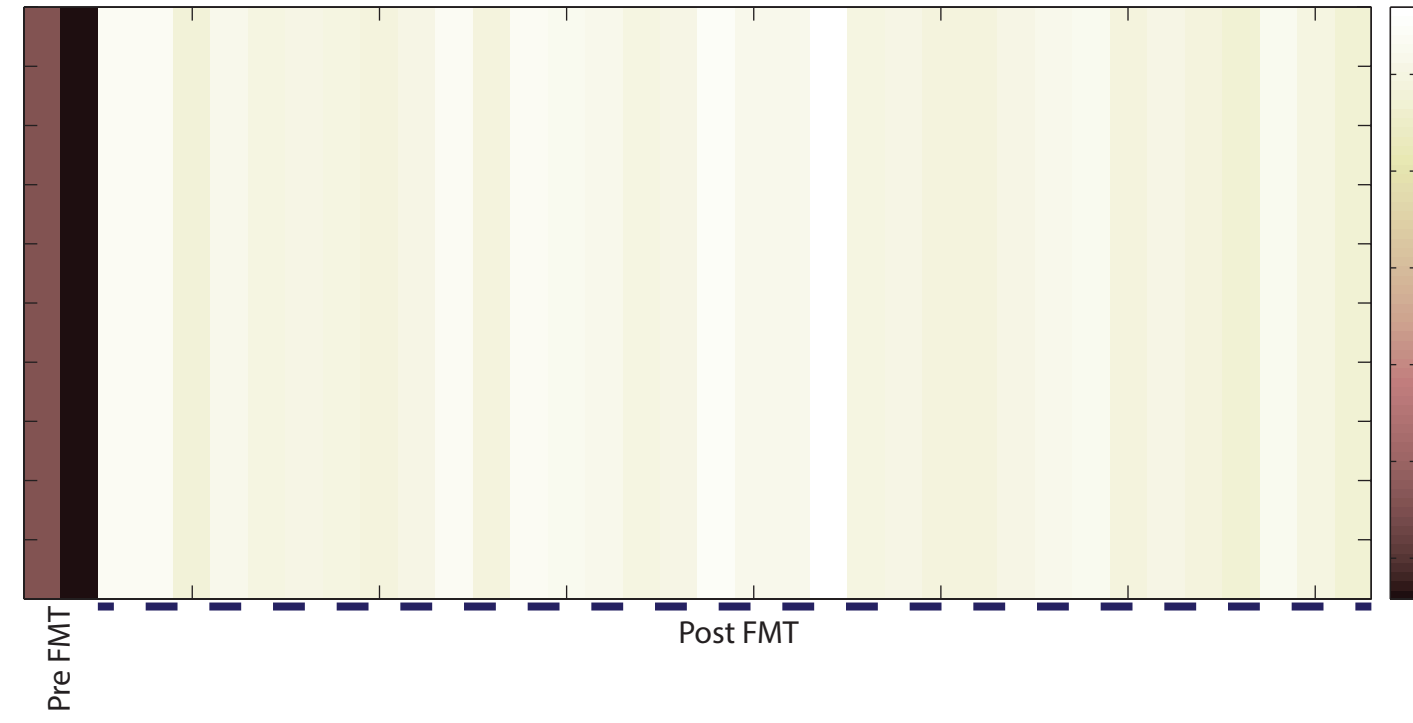

Supplement: 40168_2015_70_MOESM4_ESM.pdf [file 40168_2015_70_MOESM4_ESM.pdf]
